# Supplementary material for: A modified tank model including snowmelt and infiltration time lags for deep-seated landslides in Alpine Environments (Aggenalm, Germany)
Source: Copernicus journal article supplement (doi:10.5194/nhess-2015-341), 2016-01-18
Supplement: Supplementary file [file Revised_Manuscript_NieEtAl_NHESS.pdf › Revised_Manuscript_NieEtAl_NHESS.pdf]

# A modified tank model including snowmelt and infiltration time lags for deep-seated landslides in Alpine Environments (Aggenalm, Germany)

W. Nie <sup>1</sup>, M. Krautblatter <sup>1</sup>, K. Leith <sup>1</sup>, K. Thuro <sup>2</sup> and J. Festl <sup>3</sup>

[1]{Landslide Research, Faculty of Civil Geo and Environmental Engineering, Technische Universität München, Munich, Germany}

[2]{Engineering Geology, Faculty of Civil Geo and Environmental Engineering, Technische Universität München, Munich, Germany}

[3] {Baugeologisches Büro Bauer GmbH, Domagkstraße 1a, 80807 München}

Correspondence to: M. Krautblatter (m.krautblatter@tum.de)

## Abstract

Deep-seated landslides are an important and widespread natural hazard within alpine regions, and can have significant impacts on infrastructure. Pore water pressure plays an important role in determining the stability of hydrologically triggered deep-seated landslides. Based on a simple tank model structure, we improve groundwater level prediction by introducing time lags associated with groundwater supply caused by snow accumulation, snowmelt, and infiltration in deep-seated landslides. In this study, we demonstrate an equivalent infiltration calculation to improve the estimation of time lags using a modified tank model to calculate regional groundwater levels. Applied to the deep-seated Aggenalm Landslide in the German Alps at 1000-1200 m asl, our results predict daily changes in pore water pressure ranging from -1 to 1.6 kPa depending on daily rainfall and snowmelt which are compared to piezometric measurements in boreholes. The inclusion of time lags improves the results of standard tank models by ~36% (linear correlation with measurement) after heavy rainfall and, respectively, by ~82% following snowmelt in a 1-2 day period. For the modified tank model, we introduced a representation of snow accumulation and snowmelt, based on a temperature index and an equivalent infiltration method, i.e. the melted snow-water equivalent. The modified tank model compares well to borehole-derived water pressures. Changes of pore water pressure can be modelled with 0-8% relative error in rainfall season (standard tank model: 2-16% relative error) and with 0-7% relative error in snowmelt season (standard tank model: 2-45% relative error). Here we demonstrate a modified tank model for deep-seated landslides which includes snow accumulation, snow melt and infiltration effects and can effectively predict changes in pore water pressure in alpine environments.

| Nomenclature |                                                                                                               |                       |                                                                                     |
|--------------|---------------------------------------------------------------------------------------------------------------|-----------------------|-------------------------------------------------------------------------------------|
| $\alpha$     | related coefficient between equivalent infiltration and increased ground water table, 1                       | $n$                   | average porosity of slope mass                                                      |
| $\alpha'$    | related coefficient between equivalent infiltration and increased pore water pressure, kPa/mm                 | $q_i$                 | drainage of $i^{th}$ day, mm                                                        |
| $\beta$      | average value of pore water pressure changed by drainage and ground water supply, kPa.                        | $PWP_i$               | pore water pressure of $i^{th}$ day, kPa                                            |
| $a$          | related coefficient between pore water pressure of $i^{th}$ day and $i+1^{th}$ day without infiltration, kPa. | $\Delta PWP_{(g+q)i}$ | $PWP$ changed by drainage combined groundwater supply, kPa                          |
| $b$          | related coefficient between pore water pressure of $i^{th}$ day and $i+1^{th}$ day without infiltration, 1    | $\Delta PWP_i$        | change of pore water pressure of $i^{th}$ day, kPa                                  |
| $ER_i$       | equivalent rainfall of $i^{th}$ day, mm                                                                       | $R_i^{(n)}$           | part of rainfall of $i^{th}$ day to changed pore water pressure of $i^{th}$ day, mm |
| $ES_i$       | equivalent snowmelt of $i^{th}$ day, mm                                                                       | $RH$                  | relative humidity, 1                                                                |
| $f_m$        | degree-day factor for snowmelt rate, mm/°C                                                                    | $RH_t$                | threshold of relative humidity, 1                                                   |
| $F$          | canopy covers percent, 1                                                                                      | $M$                   | time about effect of infiltration reducing to 50%, 1                                |
| $g_i$        | ground water supply of $i^{th}$ day, mm                                                                       | $R_i$                 | rainfall of $i^{th}$ day, mm                                                        |
| $g'$         | acceleration of gravity                                                                                       | !! EMBED Equation.DS  | part of snowmelt of $i^{th}$ day to changed pore water pressure of $i^{th}$ day, mm |
| $h_i$        | ground water table height the $i^{th}$ day, mm                                                                | $S_i$                 | rainfall of $i^{th}$ day, mm                                                        |
| $H$          | base water table, mm                                                                                          | $T_d$                 | daily average temperature, °C                                                       |
| $M'$         | daily snowmelt, mm                                                                                            |                       |                                                                                     |

## 1 Introduction

Deep-seated landslides in the European Alps and other Mountain Environments pose a significant hazard to people and infrastructure (Mayer et al., 2002; Madritsch and Millen, 2007; Agliardi et al., 2009). It has long been recognized that pore water pressure (PWP) changes by precipitation play a critical role for hydrologically controlled deep-seated landslide activation. The rise in PWP causes a drop of effective normal stress on potential sliding surfaces (Bromhead, 1978; Iverson, 2000; Wang and Sassa, 2003; Rahardjo et al., 2010). The estimation of pore water pressure is of great significance for anticipating deep-seated landslide stability. In past years, geotechnical monitoring systems have revealed PWP changes related to rainfall and snowmelt events (Angeli et al., 1988; Simoni et al., 2004; Hong et al., 2005; Rahardjo et al., 2008; Huang et al., 2010). Generally, two ways are employed to estimate the groundwater changes: (1) Depending on the precise information of permeability and infiltration of material, the Green and Ampt Model and the Richards Equation are generally used to describe groundwater infiltration and water table changes (producing PWP) in saturated homogeneous material (Chen and Young, 2006; Weill et al., 2009). The Van Genuchten Equation (Schaap and Van Genuchten, 2006) and the Fredlund and Xing (1994) method show better performance in the evaluation of infiltration and groundwater table in unsaturated homogeneous material. Traditional deterministic models have advantages due to their explicit physical and mechanical approaches, but they require accurate knowledge, testing and monitoring of soil physical parameters which are often not available with sufficient accuracy. For example, the widely used Fredlund and Xing method needs soil suction tests under variable moisture content which is difficult to achieve for complex landslides with multiple reworked materials. (2) Empirical-statistical models employ optimization or fitting parameters in their model structure. Tank and other models need historical monitoring data to train parameters (Faris and Fathani, 2013; Abebe et al. 2010). Such probabilistic models, because of their simple conceptualized structure, do rely to a smaller degree on explicit physical and mechanical approaches. However, they can avoid the problems induced by the uncertainty of material parameterisation and its spatial arrangement in the landslide mass. They can, therefore, be applied to a wide range of different landslide settings and we estimate that for more than 90% of all landslides no explicit parameters on

soil suction etc. are available. As one of the most common probabilistic models, tank models typically describe infiltration and evaporation in shallow soil materials (Ishihara and Kobatake, 1979). They are based on the water balance theory, which means they account for flows into and out of a particular drainage area. Multi-tank models involving two or three tank elements have been developed to better estimate groundwater fluctuations within shallow landslides induced by heavy rainfall (Michiue, 1985; Ohtsu et al., 2003; Takahashi, 2004; Takahashi et al., 2008; Xiong et al., 2009). Simple tank models do not consider infiltration time lags induced by a long infiltration path, previous moisture and snowmelt. This inhibits their applicability to deep-seated landslide. Multi-tank models can deal with infiltration time lags to some extent by adding tanks but even then they (i) require data from several monitoring boreholes to track groundwater flow supplies in complicated geological structures and (ii) they are presently not designed to replicate time lags of increased infiltration, e.g., following snowmelt (Iverson, 2000; Sidle, 2006; Nishii and Matsuoka, 2010). Applying multi-tank models to compensate for time lags is questionable as especially deep-seated landslides would need several tanks to replicate time lags and every added new tank in vertical direction introduces 3 new parameters at least. This would reduce robustness and reliability of system especially if we just use the monitored groundwater table for the parameter training of whole system. In this study, we introduce a simple method to estimate time lags by a modified standard tank model which predicts changes in pore water pressure. The innovation of our approach is to calculate equivalent infiltration before it enters the tank. The equivalent infiltration deals with the infiltration time lag including snow accumulation and snowmelt in deep-seated landslides based on a simple tank model structure. We hypothesize that, compared to a simple tank model, our modified model has a higher accuracy and physical meaning by controlling equivalent infiltration including snow accumulation and snowmelt; compared to multi-tank model our modified model is more robust and reliable. We apply our model to the Aggenalm landslide, where predicted PWP changes can be tested against piezometric borehole monitoring data. The monitoring network design and installation, as well as detailed monitoring data, and the introduction of monitoring devices have been described previously in detail (THURO et al., 2009; Thuro et al., 2011a; Thuro et al., 2011b; Festl et al., 2012; Thuro et al., 2013).

## 2 Site descriptions

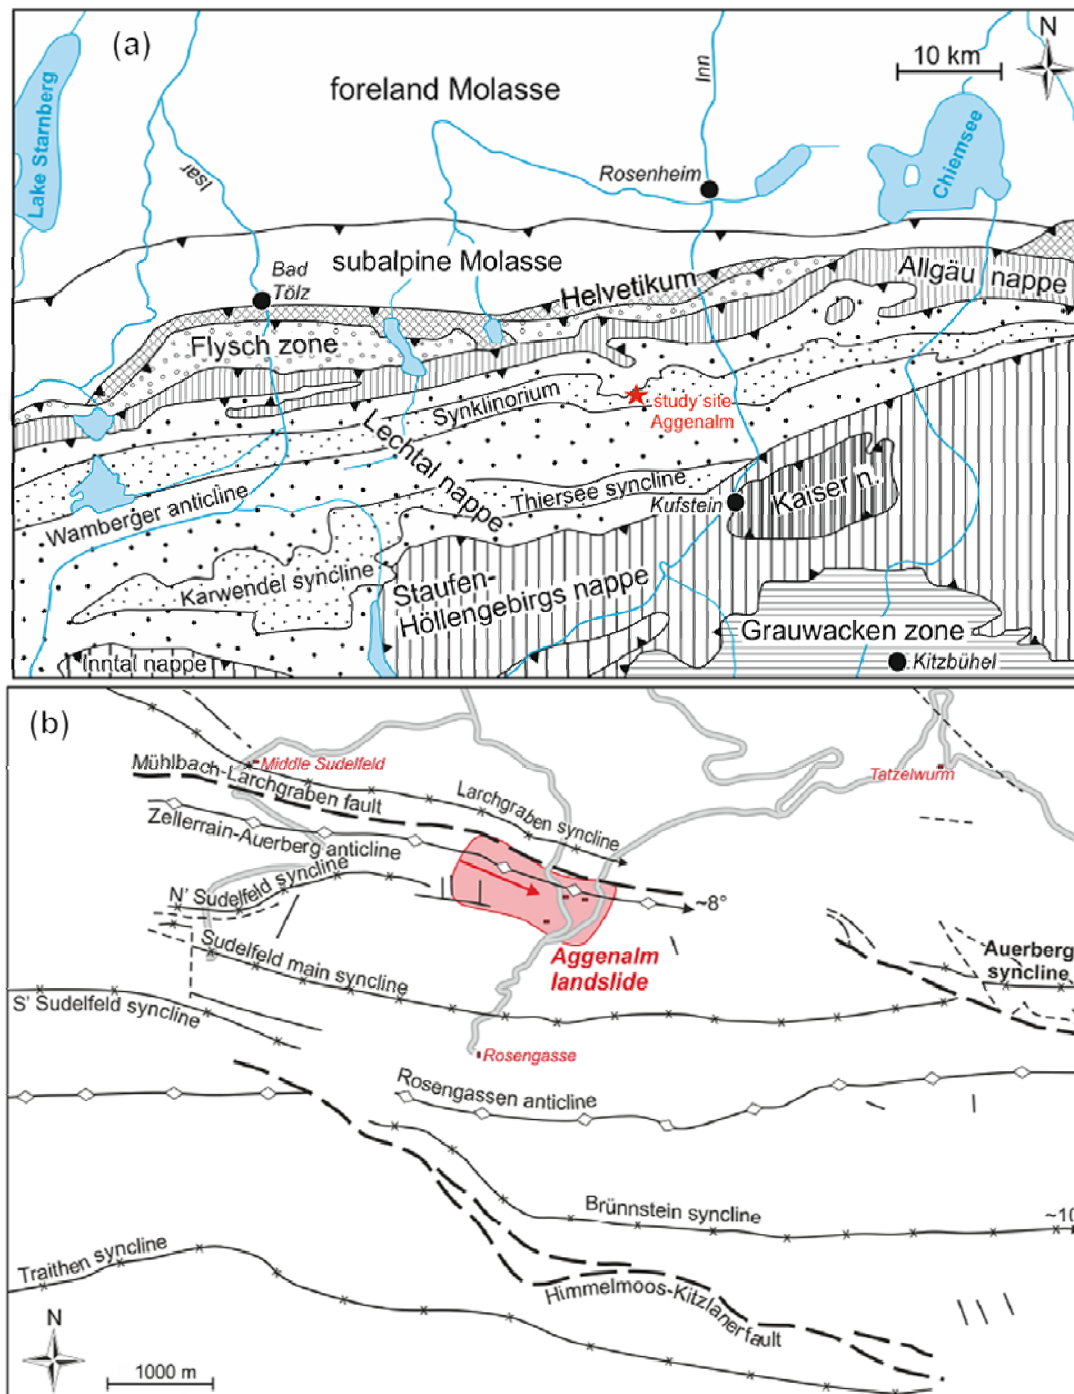

Figure 1 (a) Tectonic map of the Northern Calcareous Alps between Lake Starnberg and Lake Chiemsee. The Aggenalm Landslide is situated in the Lechtal Nappe within the Synklinorium, a major syncline–anticline–syncline fold belt, which can be traced through the whole region. (b) Detailed tectonic map showing the main tectonic features in the Aggenalm Landslide area. Here, the Synklinorium has a complex structure with several additional minor syn- and anticlines, of which the eastward dipping of the Zellerrain-Auerberg Anticline is responsible

for the nearly slope parallel orientation of the rock mass within the Aggenalm Landslide (modified from Festl 2014).

The Aggenalm Landslide is situated in the Bavarian Alps in the Sudelfeld region near Bayrischzell (Fig. 1). During the Alpine orogeny, the rock mass was faulted and folded into several large east-west oriented synclines, of which the Audorfer Syclinorium is responsible for the nearly slope-parallel bedding orientation of the rock mass in the area of the Aggenalm Landslide (Fig. 2). The Aggenalm Landslide is underlain by Late Triassic well-bedded limestones (Plattenkalk, predominantly Nor), overlain by Kössen Layers (Rhät, predominantly marly basin facies) and the often more massive Oberrhät Limestones and Dolomites (Rhät) (Fig. 2). The marls of the Kössen Layers are assumed to provide primary sliding surfaces and are very sensitive to weathering as they decompose over time to a clay-rich residual mass (Nickmann et al., 2006). The landslide mechanism can be classified as a complex landslide dominated by deep-seated sliding with earth flow and lateral rock spreading components (Singer et al., 2009). A major activation of the landslide occurred in 1935, destroying three bridges and a local road. Slow slope deformation and secondary debris flow activity has been ongoing since this time.

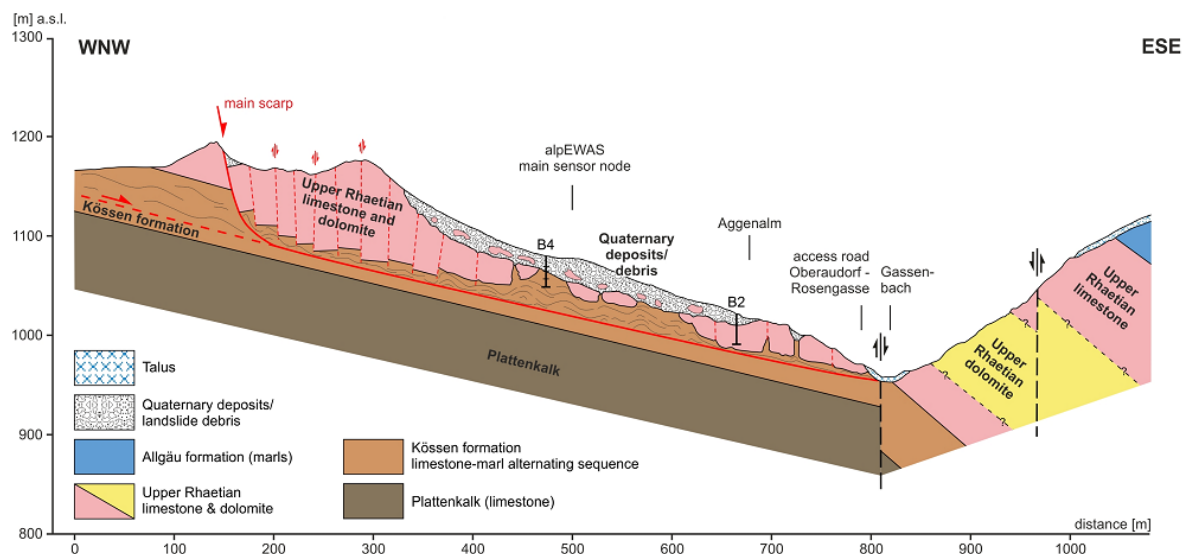

Figure 2 Geological profile of the Aggenalm Landslide (modified from Festl, 2014)

### 3 Data and Methods

#### 3.1 Climate conditions

The Aggenalm is exposed to a subcontinental climate with a pronounced summer precipitation maximum and an annually changing share of 15–40 % of the mean annual precipitation that fall as snow. Nearby meteo-stations such at the Brünsteinhaus, the Sudelfeld (Polizeiheim) and the Tatzelwurm indicate mean annual precipitation of 1594, 1523 and 1660 mm/a at similar elevations (Table 1).

Table 1 Mean monthly precipitation (1931–1960 and 1961–1990) for the Brünsteinhaus, the Sudelfeld (Polizeiheim), and Tatzelwurm meteorological stations (data from Germany's National Meteorological Service DWD).

|               | Precipitation | Oct.  | Nov.  | Dec.  | Jan.  | Feb.  | Mar.  | Winter |
|---------------|---------------|-------|-------|-------|-------|-------|-------|--------|
| Brünsteinhaus | [mm]          | 89.6  | 109.2 | 115.7 | 102.9 | 100.5 | 103.2 | 621.1  |
| (1345 m)      | [%]           | 5.6   | 6.9   | 7.3   | 6.5   | 6.3   | 6.5   | 39.0   |
| Sudelfeld     | [mm]          | 84.7  | 98.3  | 113.1 | 82.7  | 82.2  | 95.5  | 556.5  |
| (Polizeiheim) | [%]           | 5.6   | 6.5   | 7.4   | 5.4   | 5.4   | 6.3   | 36.5   |
| (1070 m)      |               |       |       |       |       |       |       |        |
| Tatzelwurm    | [mm]          | 109.9 | 106.1 | 99.1  | 123.2 | 118.7 | 110.9 | 667.9  |
| (795 m)       | [%]           | 6.6   | 6.4   | 6.0   | 7.4   | 7.1   | 6.7   | 40.2   |
|               | Precipitation | Apr.  | May.  | June. | July. | Aug.  | Sep.  | Summer |
| Brünsteinhaus | [mm]          | 121.9 | 138.4 | 194.3 | 208.6 | 193.0 | 116.8 | 973.0  |
| (1345 m)      | [%]           | 7.6   | 8.7   | 12.2  | 13.1  | 12.1  | 7.3   | 61.0   |
| Sudelfeld     | [mm]          | 103.7 | 152.3 | 204.2 | 195.1 | 199.2 | 112.0 | 966.5  |
| (Polizeiheim) | [%]           | 6.8   | 10.0  | 13.4  | 12.8  | 13.1  | 7.4   | 63.5   |
| (1070 m)      |               |       |       |       |       |       |       |        |
| Tatzelwurm    | [mm]          | 115.8 | 149.4 | 194.8 | 224.9 | 185.6 | 121.9 | 992.4  |
| (795 m)       | [%]           | 7.0   | 9.0   | 11.7  | 13.5  | 11.2  | 7.3   | 59.8   |



### 3.2 Monitoring data

Monitoring data for this study is derived from a rain gauge and humidity sensor (alpEWAS central station), and a pore water pressure sensor (PWP) installed in boreholes close to the assumed shear zone (B4, 29.4 meter deep) (Fig. 2) (Singer et al., 2009; Festl, 2014). A heated precipitation gauge provides data on the snow-water equivalent of snowfall. Short term noise in raw data was filtered. PWP, temperature, and humidity are averaged over a 24-hour period (Festl, 2014). Since the whole monitoring period lasts for almost 3 years and time lags are in the range of days, days were considered to be the most robust and appropriate time unit. The monitoring period lasts from February 2009 to December 2011. Considering data loss in some months, we have approximately 24 months of valid data. To parametrise the modified tank model, we use data from 13 months (May 2009 to June 2009; September 2009 to December 2009; February 2010 to August 2010). To validate the parametrized model, 55 days of rainfall (July 2009 to August 2009) and 44 days of snowmelt (March 2009 to April 2009) are used to compare model-calculated pore water pressure with real pore water pressure readings. In addition, a long-term consistency simulation of two years' PWP levels is compared to the two years of monitoring data of PWP levels bridging the data gaps.

### 3.3 The modified tank model including snowmelt and infiltration

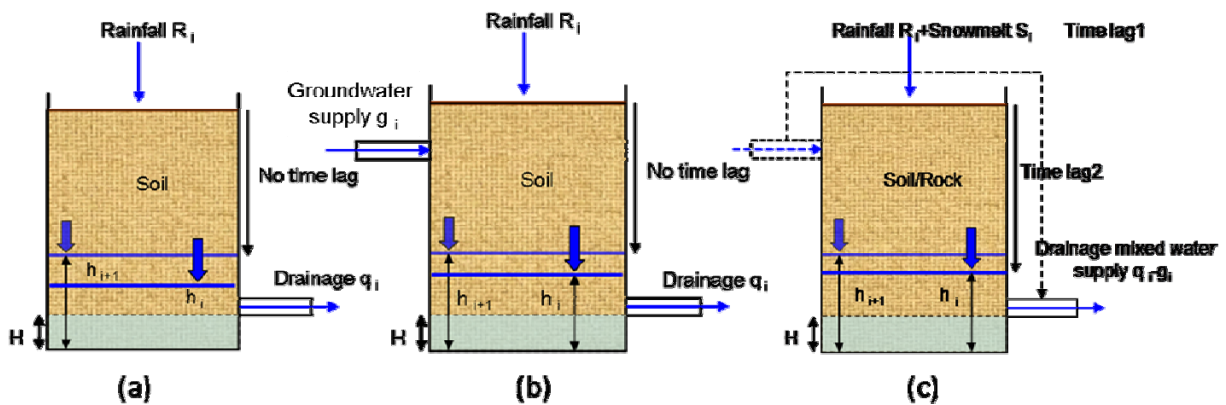

Figure 3: Design of the modified tank model. (a) Original tank model considering the vertical infiltration and drainage affecting the water table. (b) Improved model considering both vertical infiltration and horizontal water flow. (c) Modified tank model including water supply and two time lags (snowmelt and infiltration).

Figure 3 demonstrates the successive changes from the original tank model (Ishihara and Kobatake, 1979; Michiue, 1985; Ohtsu et al., 2003; Uchimura et al., 2010) to our modified



model. Fig. 3a shows the basic concept of the original tank model, the daily change in the groundwater table height  $h_{i+1} - h_i$  is

$$h_{i+1} - h_i = R_i - q_i . \quad (1)$$

where  $R_i$  is the rainfall and  $q_i$  is the drainage of the  $i^{th}$  day.  $h_i$  is groundwater table height the  $i^{th}$  day.

If groundwater supply illustrated in Fig. 3b is incorporated in the tank model, the daily change in groundwater table height  $h_{i+1} - h_i$  is

$$h_{i+1} - h_i = R_i - (q_i - g_i) , \quad (2)$$

where  $g_i$  is groundwater supply of the  $i^{th}$  day from the upper slope.

Incorporating snowmelt, Equation 3 should be written as

$$h_{i+1} - h_i = R_i + S_i - (q_i - g_i) , \quad (3)$$

where  $S_i$  is the snowmelt of the  $i^{th}$  day.

Snow accumulation and snowmelt produces our *time lag 1* controlled by ambient temperature.

Long infiltration paths which can take one or more days to reach the water table in deep-seated landslide masses cause *time lag 2* (Fig. 3c). The infiltration in  $i^{th}$  day does not only affect the groundwater table of the  $i^{th}$  day but also the groundwater table over the following  $n$  days if *time lag2* is more than one day.  $R_i$  and  $S_i$  are divided into  $n$  parts

( $R_i = \sum_{n=1}^N R_i^{(n)}$  and  $S_i = \sum_{n=1}^N S_i^{(n)}$ ,  $i, n \geq 1$ ). Each component ( $R_i^{(n)}$  and  $S_i^{(n)}$ ) contributes to daily changes

in the groundwater table ( $h_{i+n} - h_{i+n-1}$ ). For a time lag of two days, the total daily variations ( $h_{i+2} - h_{i+1}$ ) in response to rainfall and snowmelt can be described by  $R_{i-1}^{(3)} + S_{i-1}^{(3)}$ ,  $R_i^{(2)} + S_i^{(2)}$ ,

$R_{i+1}^{(1)} + S_{i+1}^{(1)}$ , considering that the groundwater table in  $i+1^{th}$  day is not only affected by the

infiltration today but also by the infiltration of the previous two days (Fig. 4).

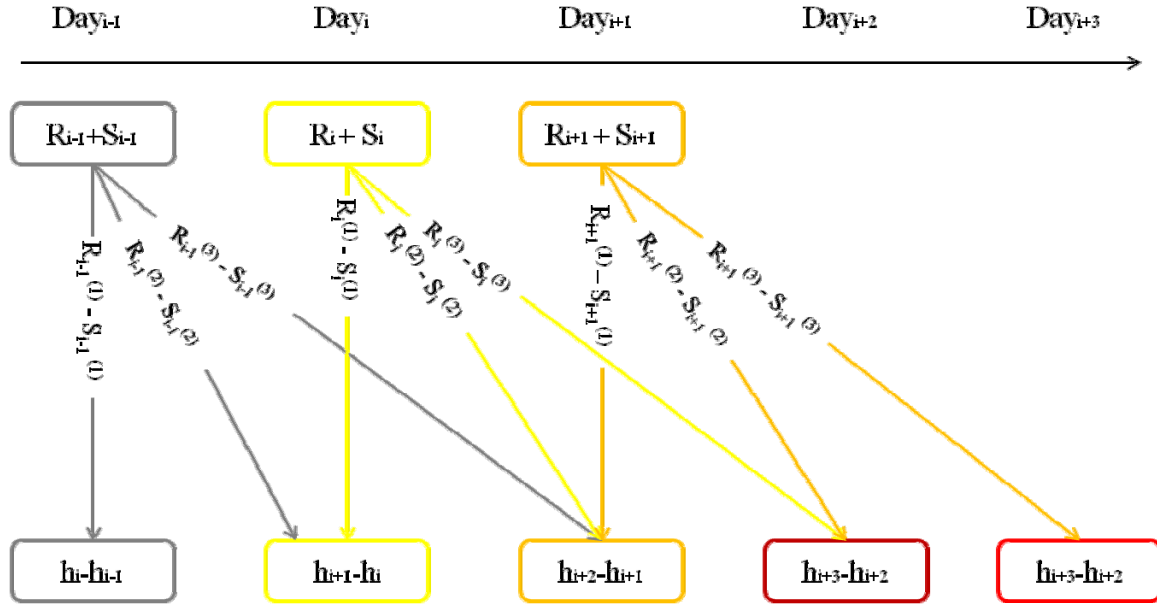

**Figure 4** Schematic diagram of water infiltration from the surface to the groundwater table for a *time lag* 2 of 2 days.

The Antecedent Precipitation Index (API) can reduce this *time lag* 2 by estimating the current water content of the ground affected by previous precipitation (Chow, 1964). This is equivalent to the infiltration calculations of some authors (Suzuki and Kobashi, 1981; Matsuura et al., 2003; Sumio Matsuura et al., 2008) who define equivalent infiltration as

$$ER_i + ES_i = (0.5)^{1/M} R_i + (0.5)^{1/M} ER_{i-1} + (0.5)^{1/M} S_i + (0.5)^{1/M} ES_{i-1}. \quad (4)$$

where  $ER_{i-1}$  and  $ES_{i-1}$  represent the equivalent rainfall and snowmelt of  $i-1^{th}$  days, respectively;  $R_i$  and  $S_i$  mean the rainfall and snowmelt of  $i^{th}$  day;  $(0.5)^M$  means the effect of infiltration reduces to 50% in  $M$  days, where  $M$  is determined by field observations. The whole modified tank model with an equivalent infiltration method could substitute both, *time lag* 1 by integrating snow accumulation and snowmelt (Section 2.4) and *time lag* 2. The relationship between infiltration and water table is often proportional in slopes (Matsuura et al., 2008; Schulz et al., 2009; Thuro et al., 2010; Yin et al., 2010). Therefore, the conceptual equation of changed water table should be like:

$$\Delta h_i = h_{i+1} - h_i = \frac{\alpha}{n} (ER_i + ES_i) - (q_i - g_i). \quad (5)$$

where  $\alpha$  is a proportional coefficient (only for ideal tank model,  $\alpha$  is one) and  $n$  is the average porosity of slope mass. Hereby, “pore water pressure” is positive pressure induced by groundwater table height. It does not refer to perched water or negative pore water pressures.

Thus,  $PWP$  can be linearly correlated to groundwater levels as Eq. (6).

$$\Delta PWP_i = \frac{\alpha g'}{n} (ER_i + ES_i) - \Delta PWP_{(g+q)i} \quad (6)$$

where,  $g'$  is acceleration of gravity,  $\Delta PWP_{(g+q)i}$  is the  $PWP$  change by subsurface inflows and outflows on the  $i^{th}$  day. This allows us to evaluate changes in  $PWP$  resulting from infiltration, drainage, and groundwater supply. The major part of pore water pressure is static pressure induced by water table height. Minor components are seepage force and the difference of pressures in the available pore space over drier and wetter periods. Since the tank model is a “grey box model”, we do not know the exact proportions of static pressure, seepage pressure, and pressure dynamics in pore space, which are all three included in our equivalent pore water pressure.

$$\Delta PWP_i = \alpha' (ER_i + ES_i) - \Delta PWP_{(g+q)i} \quad (7)$$

In Eq. (7),  $\alpha'$  replaces  $\frac{\alpha g'}{n}$  to simplify the model. The workflow chart of our modified tank model for change of  $PWP_i$  is indicated in Fig. 5.

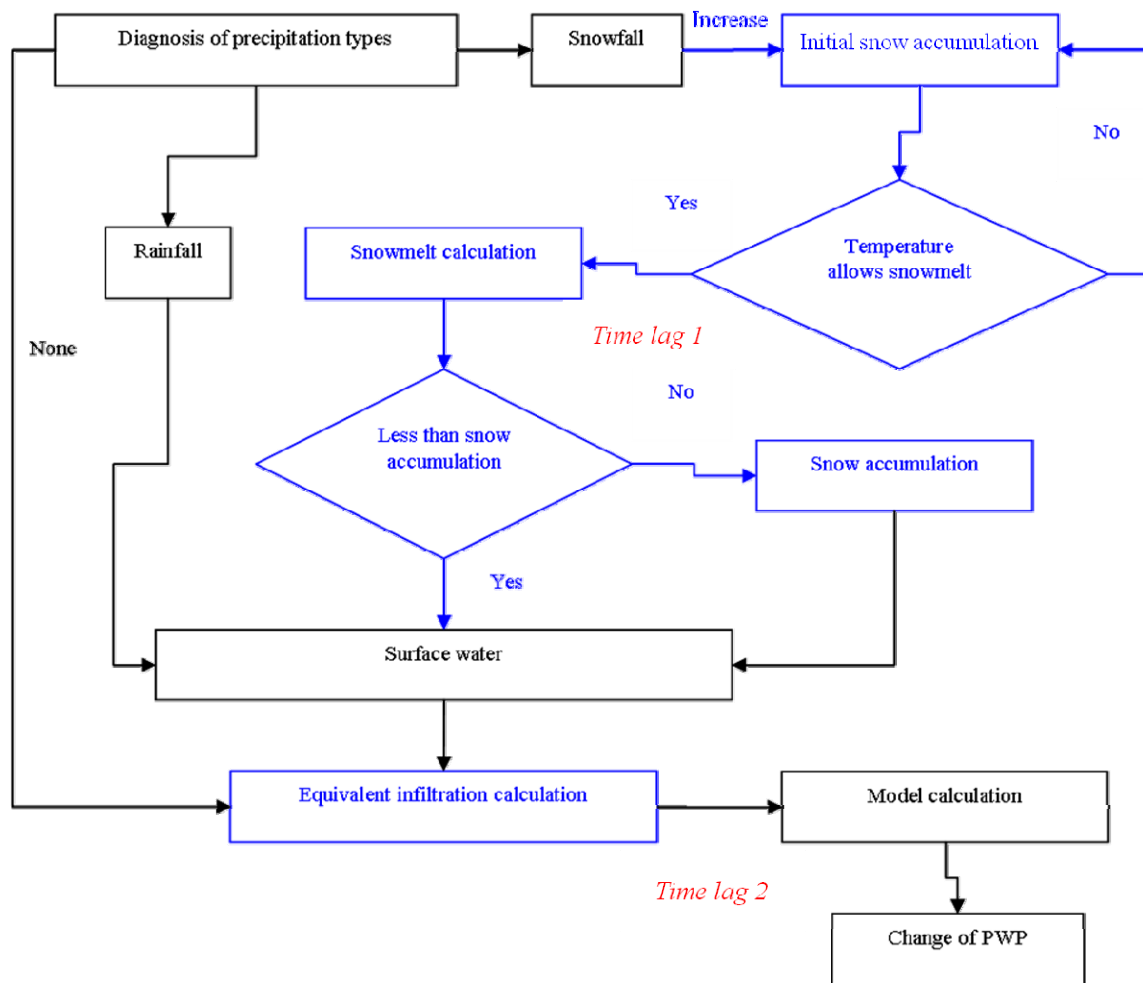

Figure 5 The workflow chart of the modified tank model with respect to the original model. Time lags from snow accumulation, snowmelt and infiltration are highlighted in blue.

### 3.4 Model assumptions to simplify slope hydrology

We assume that Quaternary deposits control the hydraulic properties of the tank model (tank interior with soil/rock in Fig. 3). The fractured limestone and dolomite control the water flow from higher to lower elevations (groundwater inflow and drainage in Fig. 3). The marly Kössen Beds are treated as impermeable layers (thin, low porosity and high normal stress above). As this is a regional groundwater table estimation, we can use the modified tank model to simulate the groundwater table changes induced by precipitation. We ignore surface runoff flow resulting from snowmelt and heavy rainfall as (1) the slope angle is less than  $15^\circ$ , (2) the cumulative snowpack is no more than 70 cm during monitoring days and (3) the infiltration rate of slope in Quaternary deposits and on carbonates is relatively high. We ignore freezing effects on infiltration as (1) ground sealing by freezing is presumably not an

issue since the bottom temperature of snow (BTS) is next to 0°C underlain by a warmer subsoil in addition to high permeable subsoil. (2) Snow accumulation during winters and winter rainfall precipitation prevent effective cooling of ground. Due to the all-year humid climate, the rapid drainage of water in the permeable underground and the deep-seated nature of the slope movement, we did not explicitly consider evapotranspiration.

### 3.5 Determining change in pore water pressure in the modified tank model

In order to determine an appropriate value of  $\alpha'$  for Aggenalm Landslide, we use 13 months training data to fit equivalent rainfall and  $\Delta PWP$  (Fig. 6 and Fig. 7).

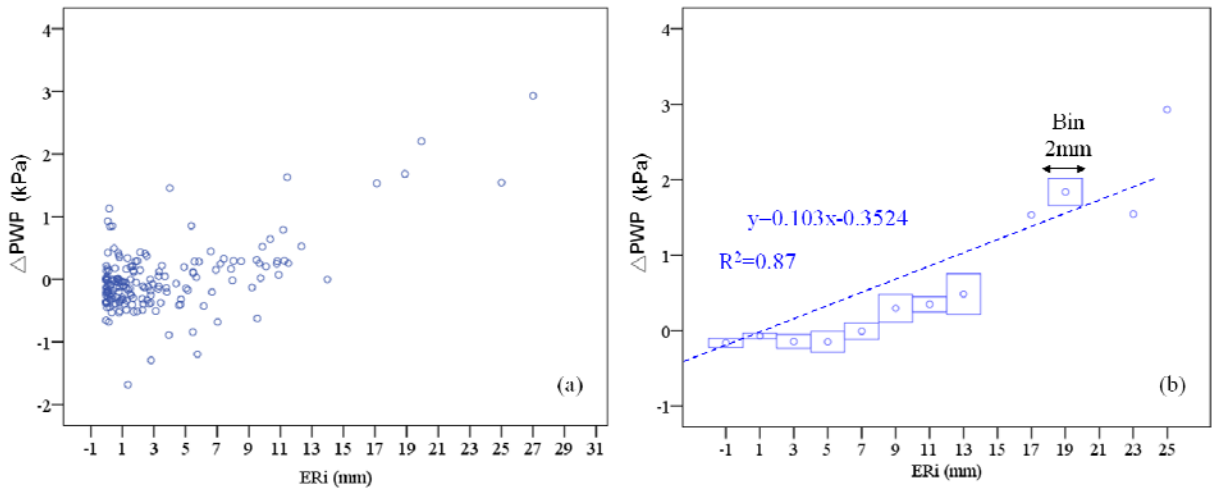

Figure 6 (a) Daily equivalent rainfall  $ER_i$  versus daily change of pore water pressure  $\Delta PWP_i$  in absolute values for 13 months (Sep. 2009 - Feb. 2010 and May 2010 – Nov 2010). (b)  $\Delta PWP_i$  has been aggregated in bins of mean values for discrete steps of daily equivalent rainfall (mean +1 sigma error).

The linear relationship between daily change of pore water pressure ( $\Delta PWP_i$ ) and daily equivalent rainfall ( $ER_i$ ) for absolute data is shown in Fig. 6a. We then aggregate bins of mean values of daily change of pore water pressure for daily equivalent rainfall (Fig. 6b) to replace data of the same width (Fig. 6a) (Freedman et al., 1998). The result shows change of  $PWP_i$  as

$$\Delta PWP_i = \alpha' ER_i - \beta. \quad (8)$$

where,  $\alpha'$  [kPa/mm] is 0.103 and relates rainfall to pore pressure increase and  $\beta$  (-0.3524) [kPa] is the average daily decrease of pore water pressure by drainage. This means at a day without infiltration by snowmelt and rainfall the pore water pressure drops by 0.35 kPa, i.e. the water column drops by 35mm. According to the original tank theory the decrease of pore water pressure rate depends on the current pore water pressure (Michiue 1985; Ohtsu et al. 2003; Takahashi 2004; Takahashi et al., 2008; Xiong et al., 2009; Uchimura et al., 2010). In reality, the relationship can only be calculated by monitoring an extended period without infiltration. As shown in Fig. 7a, the observation of  $PWP$  is within 48 days without rainfall input where drainage is still combined with groundwater supply. The relation between  $PWP_{i+1}$  and  $PWP_i$  without rainfall infiltration is shown in Fig. 7b and equation (9).

$$PWP_{i+1} = aPWP_i + b. \quad (9)$$

where  $a$  and  $b$  are fitted coefficients.

Thus,  $\Delta PWP_i$  calculation could be rewritten as:

$$\Delta PWP_i = \alpha'(ER_i + ES_i) - (aPWP_i - b). \quad (10)$$

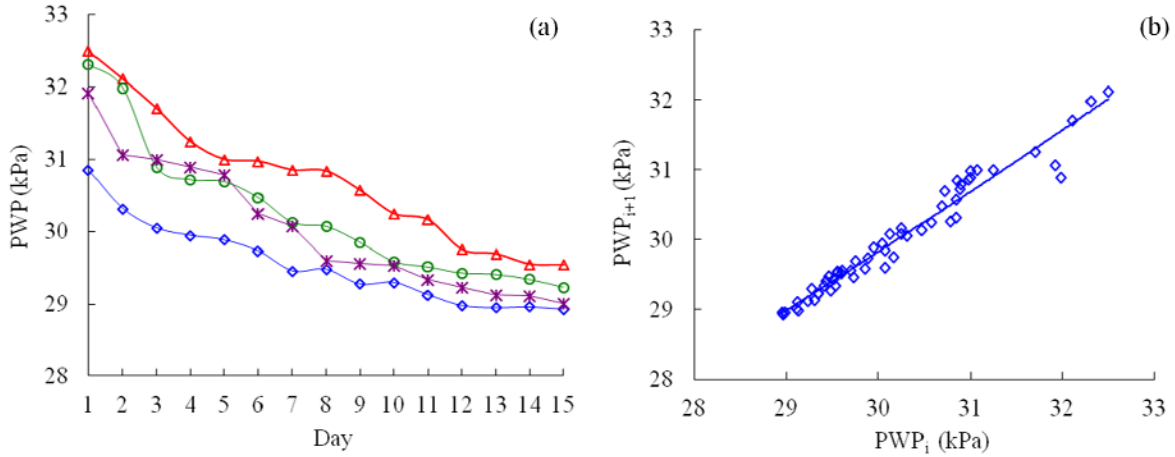

Figure 7 (a) Observation of  $PWP$  vs. time for four fifteen-day-long periods without rainfall or snowmelt. (Number of samples:  $n=48$ ) (b)  $PWP_i$  vs.  $PWP_{i+1}$  ( $i^{th}$  day of  $PWP$  correlates to  $i+1^{th}$  day of  $PWP$  for four fifteen-day-long periods without rainfall or snowmelt (Number of samples:  $n=48$ )).

## 3.6 Snowmelt calculations in modified tank model

### 3.6.1 Diagnosis of precipitation types

A threshold temperature under which the precipitation falls as snow is a key factor for a snow accumulation model. However, diagnosis of precipitation is difficult, and there are no parameters with which the type of precipitation can be accurately determined (Wagner, 1957; Koolwine, 1975; Bocchieri, 1980; Czys et al., 1996; Ahrens, 2007). The most common approach is to derive statistical relationships between some predictors and different precipitation types (Bourgouin, 2000). We select a statistical model (empirical formula) based on hundreds of observation samples in Wajima Japan, between 1975 and 1978 to estimate precipitation types (Matsuo and Sasyo, 1981). The threshold of relative humidity calculated by  $T_d$  (daily average temperature) is as follows:

$$RH_t = 124.9e^{-0.0698T_d} . \quad (11)$$

If the real relative humidity  $RH$  is smaller than  $RH_t$ , the precipitation is usually snowfall (Häggmark and Ivarsson, 1997).

### 3.6.2 Snowmelt model

One of the most popular methods employed to forecast snowmelt is to correlate air temperature with snowmelt data. Such a relation was first used for an Alpine glacier by Finsterwalder and Schunk (1887) and has since then been extensively applied and further refined (Kustas et al., 1994; Rango and Martinec, 1995; Hock, 1999, 2003). Recently, the most widely accepted temperature-index model is that of Hock (2003). The approach of daily melt assumes the form:

$$M' = f_m (T_d - T_0) . \quad (12)$$

where  $T_0$  is a threshold temperature beyond which melt is assumed to occur (typically 0°C), and  $f_m$  is a degree-day factor. We apply a widely used empirical  $f_m$  (e.g., Gottlieb, 1980; Lang, 1986; Braun et al., 1994; Hock, 2003), which reflects canopy cover in percent, beginning time of snowmelt, etc., In this study, the degree-day factor is calculated by the empirical formula as follows:

$$f_m = 2.92 - 0.0164F . \quad (13)$$



where  $F$  is canopy covers of Aggenalm Landslide area in percent (Esko, 1980).

## 4 Results

### 4.1 Performance of modified tank model in heavy rainfall season

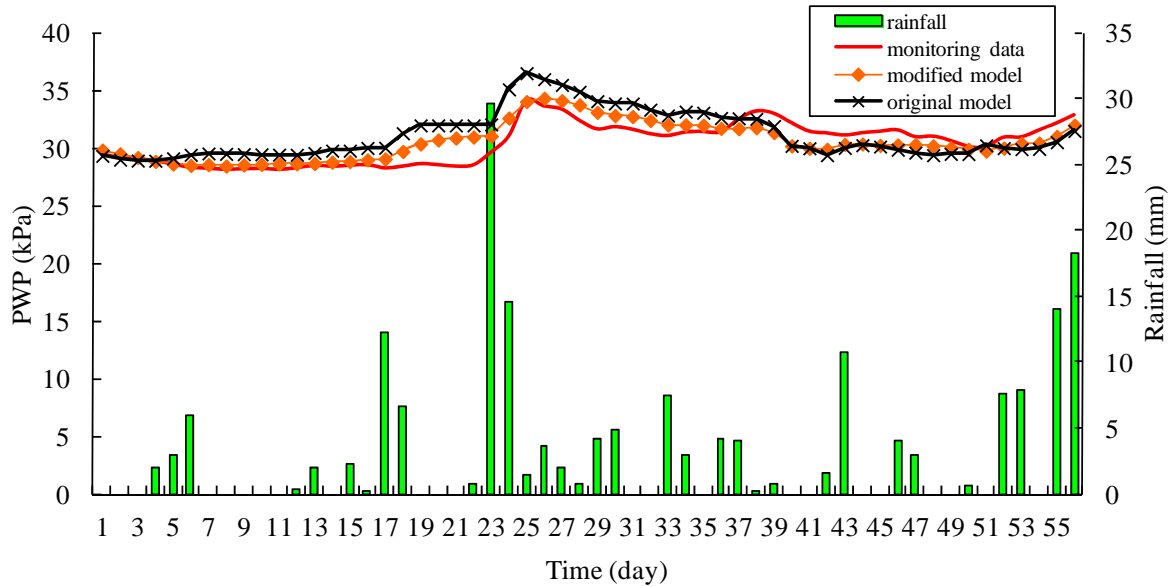

Figure 8 Estimation of the  $PWP$  using the original tank model and our modified tank model (snowmelt + time lag 1+2) during summer (07.07.2009 - 31.08.2009).

As shown in Fig. 8, our modified tank model and original tank model considering no time lag are used to estimate the change of  $PWP$  in summer. Both the original and modified tank model do reasonable estimate changes in  $PWP$  during summer. The original model, however, generally overestimates the  $PWP$  curve. The modified model matches the measurement curve better due to the infiltration *time lag* 2.

## 4.2 Performance of modified tank model in snowmelt season

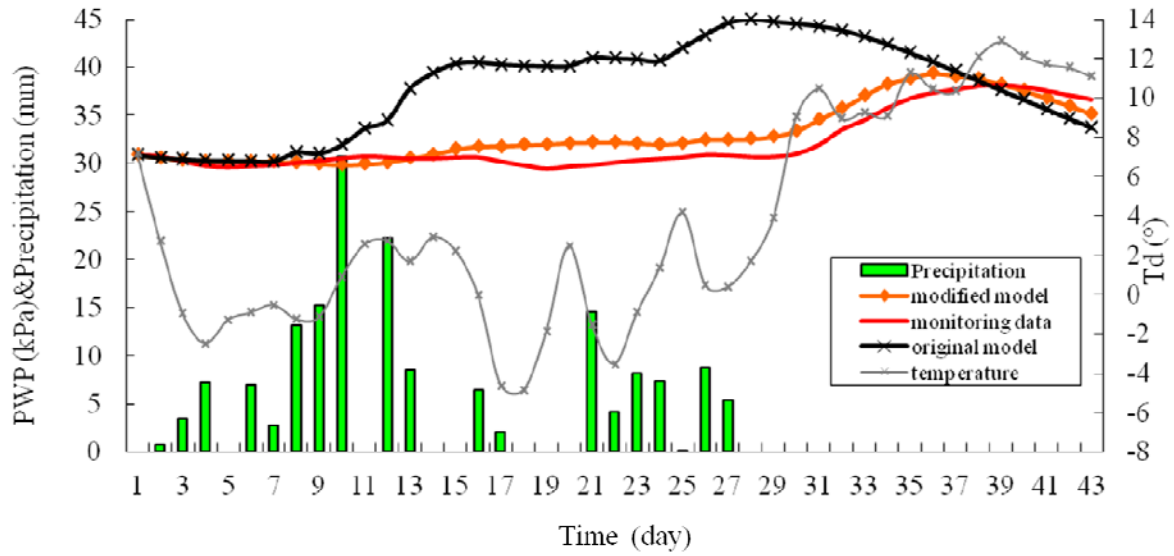

Figure 9: Estimation of the change of PWP using the original tank model and our modified tank model (snowmelt + time lag 1+2) in the snowmelt season (04.03.2009-15.04.2009).

The original model without snow accumulation and snowmelt failed to accurately estimate PWP during spring, as the change of PWP without *time lag 1* caused by the original model to overestimate PWP from the day 12-33. The modified tank model better reflects the peak of snowmelt (33<sup>th</sup>-37<sup>th</sup> day) and matches the measurement curve well in consideration of *time lag 1*. The deviation derives from the naturally limited accuracy of snow accumulation and snowmelt models. The Fig.10 indicates evaluation index of original and modified tank model including correlation, root mean square error (RMSE), and relative error. As shown in Fig. 11, modified tank model simulated the PWP levels in whole monitoring period.

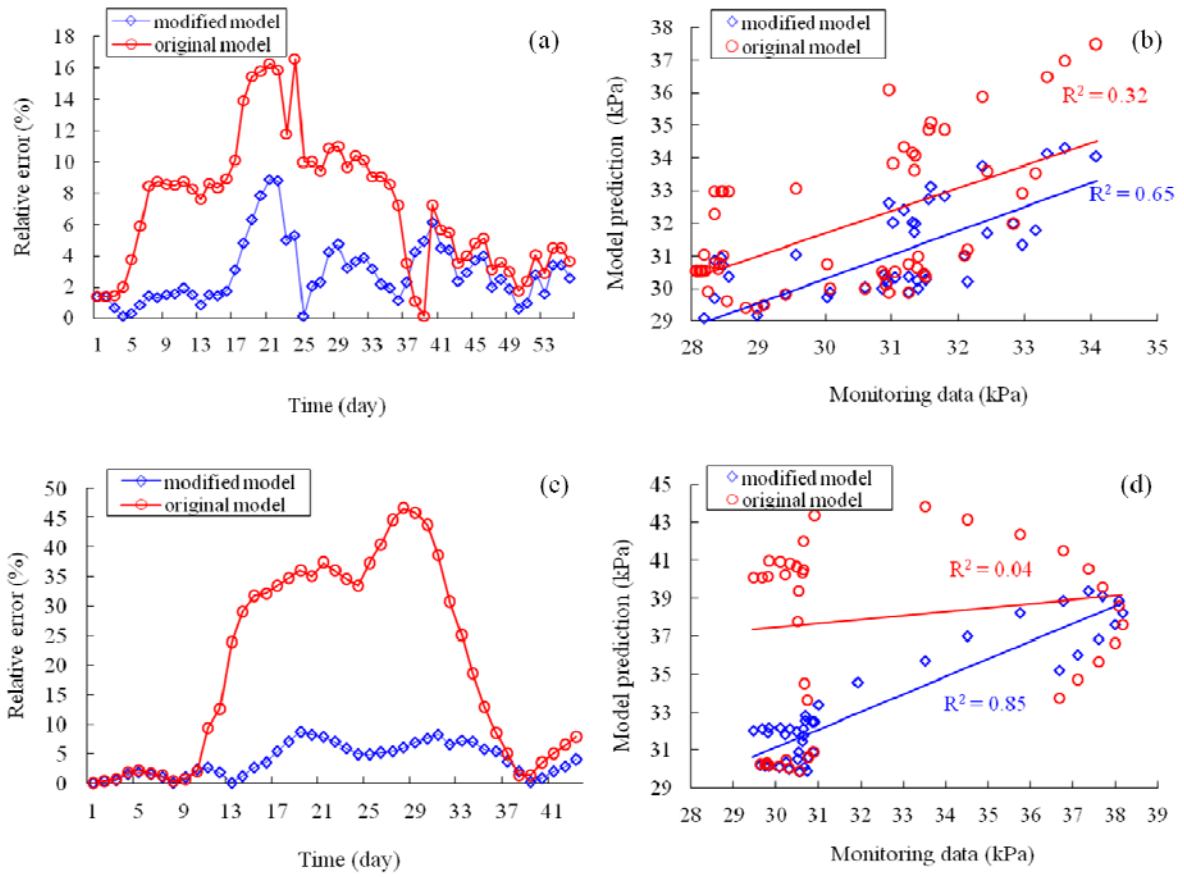

1

2 Figure 10 Evaluation of original and modified tank model (a) Correlation between  
3 measurements and original/modified tank model during a 54-day rainfall period (n=54). Root  
4 mean square errors (RMSE) for the original and modified models are 1.9 and 0.97  
5 respectively. (b) Correlation between measurements and original/modified tank model in  
6 snowmelt period (n=47). Root mean square error (RMSE) approaches 5.4 and 1.3 for the  
7 original model and the modified model. (c) Relative error of original and modified tank model  
8 in summer (n=54). (d) Relative error of original and modified tank model during spring  
9 (n=47).

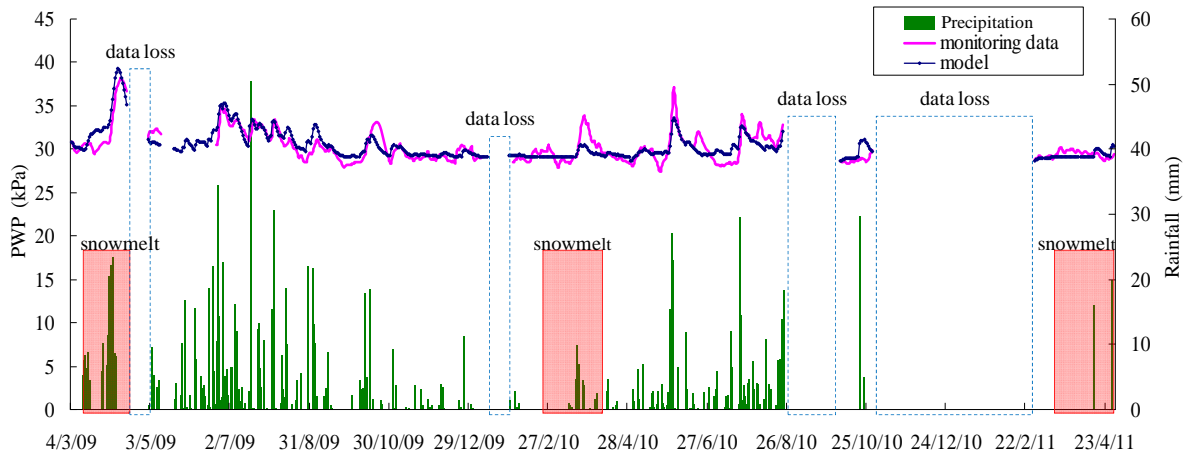

Figure 11 Long-term consistency simulation of *PWP* using the modified tank model throughout the entire monitoring period (04.03.2009-23.04.2011).

## 5 Discussion

In order to evaluate the performance of the modified tank model with respect to heavy rainfall and snowmelt, we introduce the standard Nash–Sutcliffe (1970) efficiency (NSE) which is the most widely used criterion for calibration and evaluation of hydrological models with observed data. NSE is dimensionless and is scaled onto the interval  $[-\infty, 1.0]$ . NSE is taken to be the ‘mean of the observations’ (Murphy, 1988) and if NSE is smaller than 0, the model is no better than using the observed mean as a predictor.

### 5.1 Performance of modified tank model in heavy rainfall season

The modified tank model describes the fluctuation of *PWP* reasonably well, especially during heavy rainfall days such as 23<sup>th</sup> to 26<sup>th</sup> day (43 mm) and 51<sup>th</sup> to 55<sup>th</sup> day (45 mm) (Fig. 8). The relative errors in Fig.10a are less than 3% and 4% during these days. Dry periods (such as 2<sup>nd</sup> to 7<sup>th</sup> day and 17<sup>th</sup> to 21<sup>st</sup>) agree with *PWP* measurement, with a relative error of 2-9% as shown in Fig. 10a. The low water content of the landslide materials during the dry season appears to reduce the infiltration rates (Fredlund and Xing, 1994; Schaap and Van Genuchten, 2006). And *PWP* levels increase very slowly or not at all during these periods. As a result, the relative error of our modified model is slightly higher than that during wetter intervals. Compared with the original model, our model better represents *PWP* monitoring data. Fig.10b indicates a higher linear correlation between measurements and modified tank model with

0.65 (RMSE -0.97) than the original tank model with 0.29 (RMSE -1.9). The NSEs of the original tank model and our modified tank model during the heavy rainfall season are -0.09 and 0.63 respectively. This means the standard original tank model is no better than the ‘mean of the observations’ while our modified tank model has a significantly higher explanatory power.

## 5.2 Performance of modified tank model in snowmelt season

We found a better correlation between measurements and our modified tank model with 0.86 (RMSE: 0.97) than the original tank model in which all precipitation was assumed to be rainfall and snowmelt was not considered with 0.04 (RMSE: 5.4) during snowmelt period. It has to be pointed out that the snowmelt estimation is still not very precise, as the temperature-index model is relatively simple (Garen and Marks, 2005; Herrero et al., 2009; Lakhankar et al., 2013). Also, we do not consider surface runoff due to the high permeability of surface deposits. Our modified tank model, however, provides a useful estimation of increased *PWP* in creeping landslide masses several 10’s of meters deep. The NSEs of the original tank model and modified tank model during the snowmelt season are -5.95 and 0.75 respectively, which emphasizes the performance of the modified tank model.

## 5.3 Highlights of our modified model

Compared to the simple tank model, our modified tank model improves the prediction ability by introducing the equivalent infiltration method to reduce the infiltration time lags. Compared to the recent multi-tank model researches (Ohtsu et al., 2003; Takahashi, 2004; Takahashi et al., 2008; Xiong et al., 2009), our modified tank model does not require complicated algorithms and several observation boreholes to optimize the parameters. It is a straightforward approach. The model integrates the snow accumulation/-melt model which is not considered in other tank model researches. We present a flexible approach since the model can simulate groundwater table at least two years continuously without obvious accumulative error unlike permeability-based numerical models or optimization parameter-based models needing refreshment at times (Takahashi et al., 2008; Xiong et al., 2009).

## 5.4 Drawbacks and limitations

The naturally inevitable drawback for any “probabilistic model” is that it is physically not explicit. The presented model would need further adjustments for permafrost regions, with heavily frozen soils, for very steep slopes, with significant surface runoff and for very heterogeneous slopes, with complex fractured rock masses. However, it seems well suited for large mountain landslides on moderately inclined slopes in alpine conditions with significant snow accumulations.

## 6 Conclusions

Pore water pressure is one of the important dynamic factors in deep-seated slope destabilization and our modified tank model could help to anticipate critical states of deep-seated landslide stability a few days in advance by predicting changes in pore water pressure. In this paper, we propose a modified tank model for the estimation of increased pore water pressure induced by rainfall or snowmelt events in deep-seated landslides. Compared to the original tank model, we simulate the fluctuation of *PWP* more accurately by reducing the time lag effects induced by snow accumulation, snow melt and infiltration into deep-seated landslides. In this modified model, a statistical method based on temperature and humidity controls precipitation type and a snowmelt model based on the temperature index method governs melting. Here we demonstrate a modified tank model for deep-seated landslides which includes snow accumulation, snow melt and infiltration effects and can effectively predict changes in pore water pressure in alpine environments.

## Acknowledgements

The authors thank to the support from the China Scholarship Council, and monitoring data from project “alpEWAS” especially Dr. J. Singer for providing pore pressure data and supervising earlier stages of this project.

## References

- Abebe, N.A., Ogden, F.L. & Pradhan, N.R., 2010. Sensitivity and uncertainty analysis of the conceptual HBV rainfall–runoff model: Implications for parameter estimation. *Journal of Hydrology*, 389(3), pp.301–310.
- Agliardi, F., Crosta, G. B., Zanchi, A., and Ravazzi, C.: Onset and timing of deep-seated gravitational slope deformations in the eastern Alps, Italy. *Geomorphology*, 103 (1), 113–129, 2009.
- Ahrens, C. D.: *Meteorology today: an introduction to weather, climate, and the environment*. Cengage Learning. 2007.
- Angeli, M. G., Gasparetto, P., Silano, S., Tonnetti, G.: An automatic recording system to detect critical stability conditions in slopes. *Proc. of the 5th ISL*, Vol. 1. Lausanne, 375–378, 1988.
- Bromhead, E. N.: Large landslides in London Clay at Herne Bay, Kent. *Quarterly Journal of Engineering Geology and Hydrogeology*, 11(4), 291-304, 1978.
- Braun, L. N., Aellen, M., Funk, M., Hock, R., Rohrer, M. B., Steinegger, U., Kappenberger, G., and Müller-Lemans, H.: Measurement and simulation of high alpine water balance components in the Linth-Limmern head watershed (Northeastern Switzerland). *Z. Gletscherkd. Glazialgeol*, 30, 161–185, 1994.
- Bourgouin, P.: A method to determine precipitation types. *Weather and forecasting*, 15 (5), 583-592, 2000.
- Bocchieri, J. R.: The objective use of upper air sounding to specify precipitation type. *Mon. Wea. Rev.*, 108, 596–603, 1980.
- Chow, Ven. Te.: Runoff, *Handbook of Applied Hydrology*. Mc Graw Hill Book Comp, pp. 14.5-14.8. In Chow Ven Te (ed) 1964.
- Czys, R. R., Scott, R.W., Tang, K. C., Przybylinski, R. W., and Sabones, M. E.: A physically based, nondimensional parameter for discriminating between locations of freezing rain and ice pellets. *Wea. Forecasting*, 11, 591–598, 1996.
- Chen, L. and Young, M. H.: Green-Ampt infiltration model for sloping surfaces. *Water resources research*, 42 (7), W07420, doi:10.1029/2005WR004468, 2006.



- 1 Cruden, D. M. and Varnes, D. J.: Landslide types and processes. In: Turner, A. K. and  
2 Schuster, R. L. (ed.). Landslides: Investigation and Mitigation. Transportation Research  
3 Board National Research Council. Special Report 247, 36-75, Washington, National  
4 Academy Press. 1996.
- 5 Esko, K.: On the values and variability of degree-day melting factor in Finland. *Nordic*  
6 *hydrology*, 11 (5), 235-242, 1980.
- 7 Freedman, D., Pisani, R., and Purves, R.: Statistics (3rd ed). Norton & Company. 113, 1998.
- 8 Finsterwalder, S. and Schunk, H.: Der Suldenferner. *Zeitschrift des Deutschen und*  
9 *Oesterreichischen Alpenvereins* 18, 72–89, 1887.
- 10 Festl, J., Singer, J. & Thuro, K. (2012): The Aggenalm landslide – first findings of the  
11 monitoring data. – In: Eberhardt, E., Froese, C., Turner, A. K. & Leroueil, S. [eds.] (2012):  
12 Landslides and Engineered Slopes: Protecting society through improved understanding. –  
13 1995 p., 11. International & 2nd National North American Symposium on Landslides,  
14 Banff, Alberta, Canada, June, 3rd – 8th 2012, London (Balkema), 907-912.
- 15 Festl, J.: Analysis and Evaluation of the Geosensor Network's Data at the Aggenalm  
16 Landslide, Bayerischzell, Germany. PhD thesis, Technical University Munich, Munich,  
17 Germany, 2014.
- 18 Faris, F. & Fathani, F., 2013. A Coupled Hydrology/Slope Kinematics Model for Developing  
19 Early Warning Criteria in the Kalitlaga Landslide, Banjarnegara, Indonesia. In *Progress of*  
20 *Geo-Disaster Mitigation Technology in Asia*. Springer, pp. 453–467.
- 21 Fredlund, D. G., and Xing, A.: Equations for the soil-water characteristic curve. *Canadian*  
22 *Geotechnical Journal*. Vol. 31, 521-532, 1994.
- 23 Gottlieb, L.: Development and applications of a run off model for snow covered and  
24 glacierized basins. *Nord. Hydrol.* 11, 255–284, 1980.
- 25 Garen, D. C. and Marks, D.: Spatially distributed energy balance snowmelt modelling in a  
26 mountainous river basin: estimation of meteorological inputs and verification of model  
27 results, *J. Hydrol.*, 315, 126–153, 2005.
- 28 Hock, R.: A distributed temperature-index ice- and snowmelt model including potential direct  
29 solar radiation. *J. Glaciol.* 45, 101–111, 1999.

- 1 Hock, R.: Temperature index melt modelling in mountain areas. *J. Hydrol.* 282, 104–115,  
2 2003.
- 3 Häggmark, L. and Ivarsson, K. I.: MESAN Mesoskalig analys, SMHI RMK Nr. 75, 21-28,  
4 1997.
- 5 Huang, A. B., Lee, J. T., Ho, Y. T., and Chiu, Y. F.: Stability monitoring of rainfall-induced  
6 deep landslides through pore pressure profile measurements. *Soils and Foundations*, 52 (4):  
7 737-747, 2012.
- 8 Herrero, J., Polo, M. J., Moñino, A., and Losada, M. A.: An energy balance snowmelt model  
9 in a Mediterranean site, *J. Hydrol.*, 371, 98–107, 2009.
- 10 Hong, Y., Hiura, H., Shino, K., Sassa, K. and Fukuoka, H.: Quantitative assessment of the  
11 influence of heavy rainfall on a crystalline schist landslide by monitoring system—a case  
12 study of the Zentoku landslide, Japan. *Landslides* 2, 31–41, 2005.
- 13 Iverson, R. M.: Landslide triggering by rain infiltration. *Water resources research*, 36 (7):  
14 1897-1910, 2000.
- 15 Ishihara, Y., and Kobatake, S.: Runoff model for flood forecasting. *Bulletin of the Disaster*  
16 *Prevention Research Institute* 29 (1), 27-43, 1979.
- 17 Kustas, W. P., Rango, A., and Uijlenhoet, R.: A simple energy budget algorithm for the  
18 snowmelt runoff model. *Water Resour. Res.* 30 (5), 1515–1527, 1994.
- 19 Koolwine, T.: Freezing rain. M.S. thesis, Dept. of Physics, University of Toronto, 92 pp.  
20 1975. [Available from University of Toronto Libraries, 27 King's College Circle, Toronto,  
21 ON M5S1A1, Canada.]
- 22 Lang, H.: Forecasting meltwater runoff from snow-covered areas and from glacier basins. In:  
23 Kraijenhoff, D.A. and Moll, J.R. (Eds.), *River Flow Modelling and Forecasting*, D. Reidel  
24 publishing company, pp. 99–127, Chapter 5, 1986.
- 25 Lakhankar, T. Y., Muñoz, J., Romanov, P., Powell, A. M., Krakauer, N. Y., Rossow, W. B.,  
26 and Khanbilvardi, R. M.: CREST-Snow Field Experiment: analysis of snowpack properties  
27 using multifrequency microwave remote sensing data, *Hydrol. Earth Syst. Sci.*, 17, 783–  
28 793, doi:10.5194/hess-17-783-2013.

- 1 Linzer, H. G., Ratschbacher, L., and Frisch, W.: Transpressional collision structures in the  
2 upper crust: the fold-thrust belt of the Northern Calcareous Alps. *Tectonophysics*, 242 (1):  
3 41-61, 1995.
- 4 Lodge, G. M. and Brennan, M. A.: Rainfall and soil water content at a native pasture site near  
5 Barraba, NSW. In: Boschma, S.P., Serafin, L.M. and Ayres, J.F. (eds) 'Proceedings of the  
6 23rd Annual Conference of the Grassland Society of NSW (Grassland Society of NSW Inc:  
7 Orange)', 137-140, 2008.
- 8 Matsuo, T., and Sasyo, Y.: Non-Melting Phenomena of Snowflakes Observed in Sub  
9 saturated Air below Freezing Level, *Journal of the Meteorological Society of Japan*. 59, 26-  
10 32, 1981.
- 11 Mayer, K., Müller-Koch, K., and von Poschinger, A.: Dealing with landslide hazards in the  
12 Bavarian Alps[C]/Proceedings of the 1st European conference on landslides, Prague.  
13 Balkema, Rotterdam. 417-421, 2002.
- 14 Matsuura, S., Asano, S., and Okamoto, T.: Relationship between rain and/or meltwater, pore-  
15 water pressure and displacement of a reactivated landslide. *Engineering Geology*, 101 (1),  
16 49-59, 2008.
- 17 Mandl, G. W.: The Alpine sector of the Tethyan shelf—examples of Triassic to Jurassic  
18 sedimentation and deformation from the Northern Calcareous Alps. *Mitteilungen der*  
19 *Österreichischen Geologischen Gesellschaft*, 92, 61-77, 2000.
- 20 Madritsch, H. and Millen, B. M. J.: Hydrogeologic evidence for a continuous basal shear zone  
21 within a deep-seated gravitational slope deformation (Eastern Alps, Tyrol, Austria).  
22 *Landslides*, 4 (2), 149-162, 2007.
- 23 Michiue, M.: A method for predicting slope failures on cliff and mountain due to heavy rain.  
24 *Natural disaster science* 7 (1),1-12, 1985.
- 25 Murphy, A., 1988. Skill scores based on the mean square error and their  
26 relationships to the correlation coefficient. *Monthly Weather Review* 116,  
27 2417–2424.
- 28 Nash, J.E., Sutcliffe, J.V., 1970. River flow forecasting through. Part I. A conceptual  
29 models discussion of principles. *Journal of Hydrology*. 10, 282–290.

- 1 Nickmann, M., Spaun, G., and Thuro, K.: Engineering geological classification of weak  
2 rocks. *International Association for Engineering Geology and the Environment*, 492, 9,  
3 2006.
- 4 Nishii, R. and Matsuoka, N.: Monitoring rapid head scarp movement in an alpine rockslide,  
5 *Engineering Geology*, 115 (1), 49-57, 2010.
- 6 Ohtsu, H., Janrungautai, S. and Takahashi, K.: A study on the slope risk evaluation due to  
7 rainfall using the simplified storage tank model. In: *Proceeding of the 2nd Southeast Asia*  
8 *Workshop on Rock Engineering*, Bangkok, Thailand, 67-72, 2003.
- 9 Rango, A. and Martinec, J.: Revisiting the degree-day method for snowmelt computations.  
10 *JAWRA – J. Am. Water Resour. Assoc.* 31, 657–670, 1995.
- 11 Rahardjo, H., Leong, E. C. and Rezaur, R. B.: Effect of antecedent rainfall on pore-water  
12 pressure distribution characteristics in residual soil slopes under tropical rainfall.  
13 *Hydrological Processes*, 22 (4), 506-523, 2008.
- 14 Rahardjo, H., Nio, A. S., Leong, E. C. and Song, N. Y.: Effects of groundwater table position  
15 and soil properties on stability of slope during rainfall. *Journal of geotechnical and*  
16 *geoenvironmental engineering*, 136 (11), 1555-1564, 2010.
- 17 Schaap, M. G. and Van Genuchten, M. T.: A modified Mualem–van Genuchten formulation  
18 for improved description of the hydraulic conductivity near saturation. *Vadose Zone*  
19 *Journal*, 5 (1), 27-34, 2006.
- 20 Sidle, R. C.: Field observations and process understanding in hydrology: essential  
21 components in scaling. *Hydrological Processes*, 20 (6), 1439-1445, 2006.
- 22 Singer, J., Schuhbäck, S., Wasmeier, P., Thuro, K., Heunecke, O., Wunderlich, T. and Festl,  
23 J.: Monitoring the Aggenalm landslide using economic deformation measurement  
24 techniques. *Austrian J Earth Sci*, 102 (2), 20-34, 2009
- 25 Schulz, W. H., McKenna, J. P., Kibler, J. D. and Biavati, G.: Relations between hydrology  
26 and velocity of a continuously moving landslide—evidence of pore-pressure feedback  
27 regulating landslide motion? *Landslides*, 6 (3), 181-190. 2009.
- 28 Simoni, A., Berti, M., Generali, M., Elmi, C. and Ghirotti, M.: Preliminary results from pore  
29 pressure monitoring on an unstable clay slope. *Engineering Geology* 73, 117–128, 2004.

- 1 Suzuki, M. and Kobashi, S.: The critical rainfall for the disasters caused by slope  
2 failures. Journal of Japan Society of Erosion Control Engineering (Shin-Sabo), 34 (2), 16-  
3 26, 1981.
- 4 Takahashi, K., Ohnishi, Y., Xiong, J. and Koyama, T.: Tank model and its application to  
5 groundwater table prediction of slope. Chinese Journal of Rock Mechanics and Engineering  
6 27 (12), 2501–2508, 2008.
- 7 Takahashi, K.: Research of underground water numerical analysis method that considering  
8 water cycle system. PhD thesis, Kyoto University, Kyoto, Japan, 2004.
- 9 Tsaparas, I., Rahardjo, H., Toll, D. G. and Leong, E. C.: Controlling parameters for rainfall-  
10 induced landslides. Computers and Geotechnics, 29 (1), 1-27. 2002.
- 11 Thuro, K., Wunderlich, Th. & Heunecke, O., Singer, J., Schuhbäck, St., Wasmeier, P.,  
12 Glabsch, J. & Festl, J. (2009): Low cost 3D early warning system for alpine instable slopes  
13 - the Aggenalm Landslide monitoring system. Kostengünstiges 3D Frühwarnsystem für  
14 alpine instabile Hänge - Das Überwachungssystem der Aggenalm-Hangbewegung. –  
15 Geomechanics & Tunneling - Geomechanik & Tunnelbau 3: 221-237.
- 16 Thuro, K., Singer, J., Festl, J., Wunderlich, Th., Wasmeier, P., Reith, Ch., Heunecke, O.,  
17 Glabsch, J. and Schuhbäck, St.: New landslide monitoring techniques–developments and  
18 experiences of the alpEWAS project.-Journal of Applied Geodesy 4, 69-90, 2010.
- 19 Thuro, K., Singer, J. & Festl, J. (2011a): A geosensor network based monitoring and early  
20 warning system for landslides.– In: Catani, F., Margottini, A., Trigila, A. & Iadanza, C.  
21 (Eds.): The Second World Landslide Forum. Abstract Book. – The Second World  
22 Landslide Forum, 3.-9. Oktober, Rom, Italien, Abstract WLF2-2011-0214, S. 267; Paper, 6  
23 P., Rom (Italian National Institute for Environmental Protection and Research).
- 24 Thuro, K., Singer, J. & Festl, J. (2011b): Low cost 3D early warning system for alpine  
25 instable slopes – the Aggenalm Landslide monitoring system. - In: Slope stability 2011.  
26 International Symposium on Rock Slope Stability in Open Pit Mining and Civil  
27 Engineering, Vancouver, Canada 18.- 21.09.2011. 12 p. (digital).
- 28 Thuro, K., Singer, J. & Festl, J. (2013): A Geosensor Network Based Monitoring and Early  
29 Warning System for Landslides. – In: Margottini, C., Canuti, P. & Sassa, K. (2013):  
30 Landslide Science and Practice, Volume 2: Early Warning, Instrumentation and  
31 Monitoring. – 685 p., Heidelberg, New York, etc. (Springer), 79-86.

- 1 Uchimura, T., Tanaka, R., Suzuki, D. and Yamada, S.: Evaluation of hydraulic properties of  
2 slope ground based on monitoring data of moisture contents. In: Proceedings of the 4th  
3 Japan-Taiwan Joint Workshop on Geotechnical Hazards from Large Earthquakes and  
4 Heavy Rainfalls, Sendai, Japan, 85-90, 2010
- 5 Wang, G. and Sassa, K.: Pore-pressure generation and movement of rainfall-induced  
6 landslides: effects of grain size and fine-particle content. *Engineering geology*, 69 (1), 109-  
7 125, 2003.
- 8 Wagner, J. A.: Mean temperature from 1000 mb to 500 mb as a predictor of precipitation  
9 type. *Bull. Amer. Meteor. Soc.*, 38, 584–590, 1957.
- 10 Weill, S., Mouche, E. and Patin, J.: A generalized Richards equation for surface/subsurface  
11 flow modelling. *Journal of Hydrology*, 366 (1), 9-20, 2009.
- 12 Wilkinson, P. L. and Brooks, S. M.: Anderson MG.: Investigating the effect of moisture  
13 extraction by vegetation upon slope stability:further developments of a combinedhydrology  
14 and stability model (CHASM). *British Hydrological Society International Symposium on*  
15 *Hydrology in a Changing Environment. Theme 4: Hydrology of environmental hazards,*  
16 *Exeter, 165–178, 1998.*
- 17 Wilkinson, P. L., Anderson, M. G. and Lloyd, D. M.: An integrated hydrological model for  
18 rain-induced landslide prediction. *Earth Surface Processes and Landforms*, 27 (12), 1285-  
19 1297, 2002.
- 20 WOLFF, H. 1985: *Geologische Karte von Bayern 1 : 25 000, Erläuterungen zum Blatt Nr.*  
21 *8338 Bayrischzell.– 190 pp., Munich (Bayer. LfU).*
- 22 Xiong, J., Ohnishi, Y., Takahashi, K. and Koyama, T.: Parameter determination of multi-tank  
23 model with dynamically dimensioned search. *Proc Symp Rock mech Jpn* 38, 19–24, 2009.
- 24 Yin, Y., Wang, H., Gao, Y. and Li, X.: Real-time monitoring and early warning of landslides  
25 at relocated Wushan Town, the Three Gorges Reservoir, China. *Landslides* 7 (3), 339-349,  
26 2010.
